# Supplementary material for: Occurrence and behavior of pharmaceuticals, steroid hormones, and endocrine-disrupting personal care products in wastewater and the recipient river water of the Pearl River Delta, South China
Source: Royal Society of Chemistry journal article supplement (doi:10.1039/c0em00602e), 2011-01-01
Supplement: c0em00602e.pdf [file c0em00602e.pdf]

**Table S1** Concentrations (ng L<sup>-1</sup>) of the pharmaceuticals, steroid hormones and hormone-like personal care products in the wastewater from two treatment systems of a sewage treatment plant in Guangzhou, South China<sup>a</sup>

|                     | IPM   | MPL   | PPL | CBZ  | E1    | E2   | αE2  | MedP | MP     | EP    | PP    | BP   | PHP   | TCC    | TCS    | BPA     |
|---------------------|-------|-------|-----|------|-------|------|------|------|--------|-------|-------|------|-------|--------|--------|---------|
| 1# treatment system |       |       |     |      |       |      |      |      |        |       |       |      |       |        |        |         |
| IN                  | 10375 | 121.0 | 9.7 | 51.6 | 65.2  | 9.4  | 7.9  | 5.0  | 1193.9 | 166.2 | 499.7 | 26.8 | 183.8 | 2353.9 | 2301.0 | 1188.0  |
| ANE                 | 7107  | 79.2  | 5.1 | 48.2 | 131.6 | 4.5  | 4.1  | <0.4 | 27.8   | 13.7  | 93.3  | 5.5  | 61.8  | 272.5  | 250.7  | 265.1   |
| SE                  | 104   | 85.7  | 3.9 | 52.8 | <0.2  | <0.3 | <0.2 | <0.4 | 4.3    | 0.7   | 5.0   | <0.3 | 13.9  | 240.4  | 117.8  | 72.6    |
| FE                  | 124   | 88.3  | 4.3 | 50.7 | <0.2  | <0.3 | <0.2 | <0.4 | 5.1    | 1.0   | 7.2   | 0.3  | 19.4  | 202.4  | 111.8  | 46.9    |
| 3# treatment system |       |       |     |      |       |      |      |      |        |       |       |      |       |        |        |         |
| IN                  | 206   | 54.3  | 4.6 | 45.8 | 66.8  | <0.3 | 20.2 | 18.0 | 1002.2 | 156.2 | 579.8 | 14.9 | 190.5 | 1217.4 | 711.5  | 13808.0 |
| FE                  | 17    | 59.5  | 2.7 | 54.2 | <0.2  | <0.3 | <0.2 | <0.4 | 7.6    | 0.9   | 10.6  | 0.3  | 25.8  | 129.5  | 80.7   | 132.4   |

<sup>a</sup> Chemicals not quantitatively detected in any sample are not included in this table. Concentration in the wastewater sample is sum of the dissolved and particulate fractions, which was calculated as:  $C_{\text{sum}} = C_{\text{D}} + C_{\text{SPM}} \times C_{\text{S}}$ , where  $C_{\text{D}}$  is the dissolved concentration measured in the filtrate,  $C_{\text{S}}$  is the sorbed concentration measured in the suspended particulate matter and  $C_{\text{SPM}}$  is the content of the suspended

particulate matter in the wastewater sample.

IN = influent; ANE = effluent from the anaerobic tank; SE = effluent from the secondary clarifier; FE = final effluent; IPM = iopromide;

MPL = metoprolol; PPL = propranolol; CBZ = carbamazepine; E1 = estrone; E2 = 17 $\beta$ -estradiol;  $\alpha$ E2 = 17 $\alpha$ -estradiol; MedP =

medroxyprogesterone; MP = methylparaben; EP = ethylparaben; PP = propylparaben; BP = butylparaben; PHP = 2-phenylphenol; TCC =

triclocarban; TCS = triclosan; BPA = bisphenol A.

**Table S2** Concentrations (ng L<sup>-1</sup>) of the pharmaceuticals, steroid hormones and hormone-like personal care products in the Pearl River at Guangzhou<sup>a</sup>

| Site        | IPM   | MPL  | CBZ  | E1   | E2   | αE2  | MP  | EP  | PP   | BP   | PHP   | TCC  | TCS  | BPA    |
|-------------|-------|------|------|------|------|------|-----|-----|------|------|-------|------|------|--------|
| March, 2008 |       |      |      |      |      |      |     |     |      |      |       |      |      |        |
| R01         | 46.5  | 22.3 | 6.4  | <0.1 | <0.1 | <0.1 | 3.2 | 0.7 | 30.3 | <0.1 | 48.1  | 15.3 | 16.2 | 1415.3 |
| R02         | 89.4  | 50.1 | 12.9 | <0.1 | <0.1 | <0.1 | 2.7 | 0.5 | 26.6 | <0.1 | 56.5  | 12.1 | 18.9 | 1035.4 |
| R03         | 45.2  | 29.5 | 5.5  | <0.1 | <0.1 | <0.1 | 4.4 | 1.1 | 34.5 | <0.1 | 61.9  | 26.5 | 25.3 | 1262.5 |
| R04         | 25.1  | 11.3 | 0.3  | <0.1 | <0.1 | <0.1 | 6.5 | 0.9 | 26.5 | <0.1 | 67.3  | 7.1  | 7.7  | 501.0  |
| R05         | 50.6  | 17.2 | 0.5  | <0.1 | <0.1 | <0.1 | 4.0 | 2.1 | 45.3 | <0.1 | 68.0  | 23.3 | 43.6 | 1007.8 |
| R06         | 41.6  | 21.7 | 4.3  | <0.1 | <0.1 | <0.1 | 5.1 | 0.6 | 40.7 | <0.1 | 71.9  | 10.6 | 11.7 | 1258.5 |
| R07         | 206.9 | 32.5 | 10.1 | 7.0  | <0.1 | 1.1  | 1.6 | 0.6 | 35.5 | 1.7  | 74.5  | 57.5 | 33.4 | 455.1  |
| R08         | 286.6 | 36.6 | 13.9 | 9.8  | <0.1 | <0.1 | 1.9 | 0.6 | 42.4 | 2.6  | 101.7 | 89.4 | 65.8 | 525.0  |
| R09         | 469.9 | 45.5 | 28.9 | 10.5 | <0.1 | <0.1 | 2.0 | 1.0 | 47.8 | 1.5  | 114.3 | 59.7 | 47.0 | 393.8  |

|           |        |       |      |      |      |      |      |      |      |      |      |       |       |       |
|-----------|--------|-------|------|------|------|------|------|------|------|------|------|-------|-------|-------|
| R10       | 391.7  | 44.0  | 25.6 | 5.6  | <0.1 | <0.1 | 1.1  | 0.5  | 31.8 | 1.8  | 64.7 | 70.9  | 57.2  | 364.8 |
| R11       | 388.3  | 50.3  | 23.8 | 8.3  | <0.1 | <0.1 | 0.9  | 0.3  | 27.2 | 1.6  | 46.2 | 80.6  | 73.2  | 497.2 |
| R12       | 1439.3 | 105.5 | 94.1 | 21.3 | <0.1 | 6.5  | 22.7 | 23.1 | 86.0 | 5.3  | 74.1 | 155.1 | 217.5 | 287.6 |
| R13       | 548.4  | 55.8  | 42.8 | 11.5 | <0.1 | <0.1 | 1.9  | 1.1  | 44.8 | 2.8  | 66.6 | 76.5  | 75.2  | 618.8 |
| May, 2008 |        |       |      |      |      |      |      |      |      |      |      |       |       |       |
| R01       | 22.5   | 17.8  | 0.3  | <0.1 | <0.1 | <0.1 | 1.4  | 0.2  | 1.2  | <0.1 | 7.0  | 24.2  | 20.1  | 541.8 |
| R02       | 27.1   | 100.4 | 29.4 | <0.1 | <0.1 | <0.1 | 25.7 | 0.6  | 14.3 | <0.1 | 35.0 | 34.9  | 48.8  | 334.5 |
| R03       | 21.6   | 25.0  | 10.4 | <0.1 | <0.1 | <0.1 | 10.7 | 1.0  | 13.8 | <0.1 | 43.1 | 31.3  | 41.7  | 591.6 |
| R04       | 21.4   | 13.2  | 7.8  | <0.1 | <0.1 | <0.1 | 4.6  | 0.7  | 10.6 | <0.1 | 44.8 | 7.8   | 25.5  | 872.9 |
| R05       | 21.4   | 14.1  | 5.0  | <0.1 | <0.1 | <0.1 | 9.7  | 0.8  | 15.4 | <0.1 | 42.2 | 9.3   | 56.5  | 767.3 |
| R06       | 26.5   | 11.8  | 2.8  | <0.1 | <0.1 | <0.1 | 3.4  | 0.4  | 5.3  | <0.1 | 40.4 | 7.9   | 24.7  | 593.3 |
| R07       | 90.1   | 15.5  | 8.3  | 7.2  | <0.1 | <0.1 | 7.4  | 1.6  | 16.8 | <0.1 | 74.7 | 36.1  | 35.4  | 505.8 |
| R08       | 52.0   | 17.8  | 5.8  | 11.8 | 1.0  | 0.8  | 9.8  | 2.0  | 13.3 | <0.1 | 32.2 | 61.8  | 61.7  | 516.7 |

|        |                |       |      |      |      |      |      |      |      |      |       |       |       |        |
|--------|----------------|-------|------|------|------|------|------|------|------|------|-------|-------|-------|--------|
| R09    | 168.7          | 22.8  | 9.1  | 6.3  | 0.3  | 1.0  | 12.5 | 2.4  | 22.6 | <0.1 | 62.6  | 34.8  | 54.7  | 553.3  |
| R10    | 148.4          | 23.8  | 6.9  | 17.9 | 4.8  | 4.3  | 66.1 | 8.2  | 45.3 | 2.2  | 41.9  | 129.0 | 152.6 | 692.2  |
| R11    | 138.5          | 24.8  | 9.8  | 15.2 | <0.1 | <0.1 | 20.9 | 4.5  | 27.9 | 1.4  | 57.3  | 88.6  | 101.8 | 721.8  |
| R12    | - <sup>b</sup> | -     | -    | -    | -    | -    | -    | -    | -    | -    | -     | -     | -     | -      |
| R13    | 307.5          | 24.9  | 10.9 | 9.1  | <0.1 | <0.1 | 12.6 | 3.4  | 23.0 | 1.7  | 51.5  | 4.9   | 62.2  | 478.8  |
| Min    | 21.4           | 11.3  | 0.3  | <0.1 | <0.1 | <0.1 | 0.9  | 0.2  | 1.2  | <0.1 | 7.0   | 4.9   | 7.7   | 278.6  |
| Max    | 1439.3         | 105.5 | 94.1 | 21.3 | 4.8  | 6.5  | 66.1 | 23.1 | 86.0 | 5.3  | 114.3 | 155.1 | 217.5 | 1415.3 |
| Median | 89.7           | 24.8  | 9.1  | 5.6  | <0.1 | <0.1 | 4.6  | 0.9  | 27.2 | <0.1 | 57.3  | 34.8  | 47.0  | 553.3  |
| Mean   | 210.5          | 33.4  | 15.0 | 5.7  | 0.2  | 0.6  | 9.7  | 2.4  | 29.2 | 0.9  | 57.9  | 46.2  | 55.1  | 671.7  |

---

<sup>a</sup> Chemicals not quantitatively detected in any sample are not included in this table.

<sup>b</sup> not analyzed.

See the footnote of Table S1 for full names of the abbreviated compounds.
